# Supplementary material for: Deletion of AS87_03730 gene changed the bacterial virulence and gene expression of Riemerella anatipestifer
Source: PubMed Central journal article supplement (PMC4772473; doi:10.1038/srep22438), 2016-03-01
Supplement: srep22438-s1.pdf [file srep22438-s1.pdf]

## Supplementary Information

### **Deletion of *AS87\_03730* gene changed the bacterial virulence and gene expression of *Riemerella anatipestifer***

Xiaolan Wang<sup>¶</sup>, Jiaping Yue<sup>¶</sup>, Chan Ding, Shaohui Wang, Beibei Liu, Mingxing Tian,  
Shengqing Yu\*

Shanghai Veterinary Research Institute, Chinese Academy of Agricultural Sciences  
(CAAS), Shanghai, P. R. China

\* Corresponding authors

E-mail: [yus@shvri.ac.cn](mailto:yus@shvri.ac.cn) (S.Y.)

<sup>¶</sup>These authors contributed equally to these work.

## Supplementary Figure

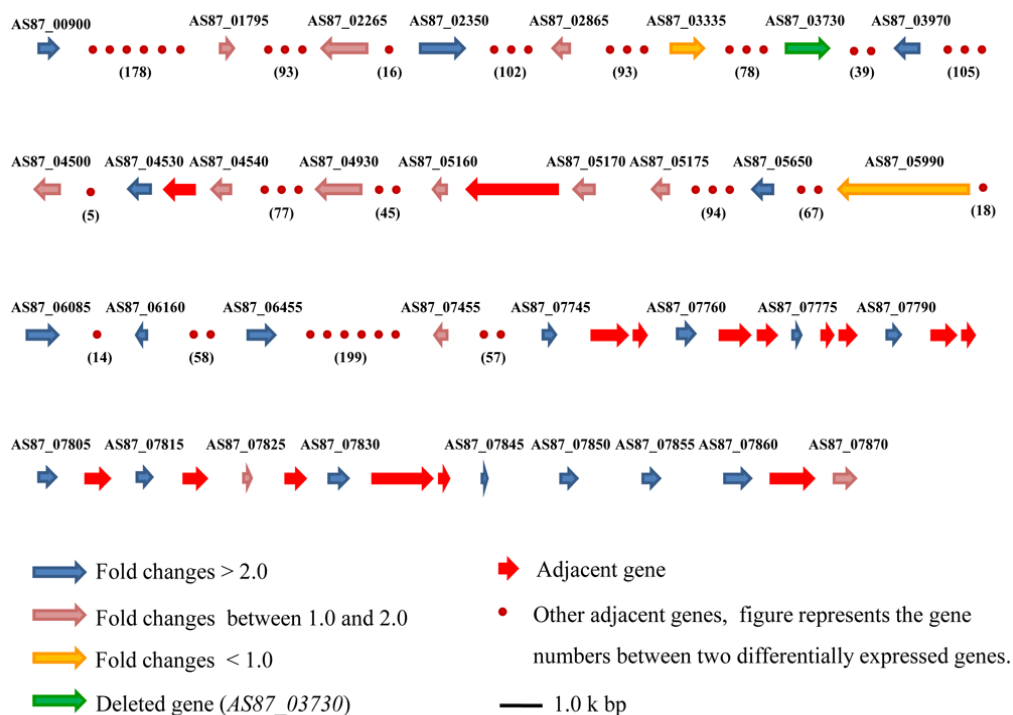

### Supplementary Figure S1. Genetic organization of differentially expressed genes.

The relative positions of each gene are assigned as predicted by the nucleotide sequence and rely on the same scale. Gene assignments are shown above the rectangles with arrow, and arrow indicates the gene transcriptional direction.

## Supplementary Tables

### Supplementary Table S1. Differentially expressed genes in mutant strain

#### Yb2ΔAS87\_03730 by RNA-Seq analysis

| Gene tag <sup>a</sup> | Fold change | Description of genes                             |
|-----------------------|-------------|--------------------------------------------------|
| AS87_07455            | 3.99        | membrane protein                                 |
| AS87_04540            | 2.92        | 50S ribosomal protein L11                        |
| AS87_07860            | 3.42        | 30S ribosomal protein S4                         |
| AS87_07745            | 3.16        | 50S ribosomal protein L23                        |
| AS87_06160            | 3.29        | 50S ribosomal protein L28                        |
| AS87_03970            | 3.89        | dTDP-4-dehydrorhamnose 3,5-epimerase             |
| AS87_07845            | 6.80        | 50S ribosomal protein L36                        |
| AS87_04500            | 3.03        | hypothetical protein                             |
| AS87_07775            | 3.98        | 50S ribosomal protein L29                        |
| AS87_01795            | 3.76        | membrane-binding protein                         |
| AS87_05175            | 4.55        | 30S ribosomal protein S12                        |
| AS87_05160            | 4.24        | 30S ribosomal protein S10                        |
| AS87_07855            | 4.33        | 30S ribosomal protein S11                        |
| AS87_07830            | 3.24        | 50S ribosomal protein L15                        |
| AS87_07790            | 4.78        | 50S ribosomal protein L24                        |
| AS87_07870            | 3.37        | 50S ribosomal protein L17                        |
| AS87_02865            | 5.13        | hypothetical protein                             |
| AS87_06085            | 3.05        | dolichyl-phosphate<br>beta-D-mannosyltransferase |
| AS87_02265            | 3.33        | S-adenosylmethionine tRNA ribosyltransferase     |
| AS87_06455            | 2.74        | 50S ribosomal protein L21                        |
| AS87_00900            | 3.27        | hypothetical protein                             |
| AS87_07825            | 3.32        | 50S ribosomal protein L30                        |
| AS87_05650            | 3.10        | hypothetical protein                             |
| AS87_07815            | 3.56        | 50S ribosomal protein L18                        |
| AS87_07805            | 5.21        | 30S ribosomal protein S8                         |
| AS87_07850            | 3.05        | 30S ribosomal protein S13                        |
| AS87_02350            | 2.48        | cystathionine beta-synthase                      |
| AS87_07760            | 2.79        | 50S ribosomal protein L22                        |
| AS87_04530            | 4.20        | 50S ribosomal protein L10                        |
| AS87_05170            | 2.79        | 30S ribosomal protein S7                         |
| AS87_03335            | 4.22        | hypothetical protein                             |
| AS87_03730            | 0.06        | acyl-protein synthetase, LuxE                    |
| AS87_04930            | 0.34        | glycosyltransferase                              |
| AS87_05990            | 0.31        | hypothetical protein                             |

<sup>a</sup> Based on *R. anatipestifer* Yb2 genome (accession number: CP007204).

**Supplementary Table S2. Primers used for real-time PCR analysis**

| Gene locus <sup>a</sup> | Forward primer sequences (5' - 3') | Reverse primer sequences (5' - 3') | Products (bp) |
|-------------------------|------------------------------------|------------------------------------|---------------|
| AS87_05650              | GCGGGAGATGATGTGGTAGT               | GAGTCAATGGCTCGCTGAGT               | 157           |
| AS87_04530              | AAAAGCAATGGAGCAAATGG               | CAGGAGCATTAGCCGTCTCT               | 101           |
| AS87_06160              | ACGAAGCGTCGTTTTGAGAT               | CAGCCTCCTCAATTCCAATC               | 130           |
| AS87_03970              | TTCCGCCTTCAGACTCCTTA               | GCTTAGAGGGGAAGGTTTGG               | 210           |
| AS87_07745              | GGTTTTCCCAACTTGAAGTCC              | TGTCTGATTGAGAGGCGTTT               | 176           |
| AS87_07845              | CCTTGCTTTGTTTAAATTTAGGG            | GAGCATCAATTAAGAAGAGAAGTGC          | 103           |
| AS87_06455              | GCTTGTTGAGGCCAAGTTGT               | TTTTCGCAGGAGCAGGTATT               | 130           |
| AS87_06085              | CTTTCGTTGGGCAATAGAGC               | TAGCAAACCCGTCCCATAG                | 181           |
| AS87_07850              | ACGTATTCCTCGTTGGCATC               | TGAATTGGCTGCAATCAGAA               | 121           |
| AS87_07760              | GTGCAGGACGCAATCTTTTC               | ATGATTGCCCTTCTTCTCCA               | 252           |
| AS87_02350              | CGACCCTCGCTCTTATTACG               | GCAGAGCCAGAAAGTGTTC                | 201           |
| AS87_07855              | GACCAGCTTCGTGAGCTACC               | TCATATCCAAGCCACGTTCA               | 173           |
| AS87_07860              | TGCAGCAGCTCTAGTTTtagca             | GCATGGGCCTAACAAAAAGAA              | 232           |
| AS87_07775              | TCTTGCATAGTCTTCCTCAAA              | AGAAGTGAAAGCTACTTATGGGAAA          | 100           |
| AS87_00900              | AAGGCTGCAGAAAAAGCAAT               | CTCCACAGCCAGGGAAATAA               | 106           |
| AS87_07790              | GGTTTGCAGCTGAAGGCTTA               | GGAAGCAAAGGAGAAGTTCTTG             | 112           |
| AS87_07830              | GGCATTGTCTCCTTCAAA                 | GGACAAGGAAGTGGAAAAGG               | 104           |
| AS87_07815              | ACCCTGCAGCAATAGCTTTC               | AAGTTTCCGGAActCAAGCA               | 204           |
| AS87_07805              | TGCTGGTTTACCAGTTTGTGTTG            | GGAAATTCCTGCATCGAAAA               | 148           |
| AS87_05175              | CACACTTGCCAAGAAGAGCA               | AAGCACCACGAACAATGTGA               | 266           |
| AS87_04540              | GGTGGTGCTGCTAATCCTTC               | CACAGCTGCAGGAGGAGTTT               | 189           |
| AS87_05170              | CTTCCAAATTCGATGCCTA                | TCTTTTTGAAGGCAGCACCT               | 161           |
| AS87_02865              | CTTTTCAGCAGGACCACCAC               | TATCTAGCGACTGCGGAAGG               | 102           |
| AS87_04500              | GGATAGGTTCGGCATCTTCA               | TTGCTTGTGACTCCCCTCT                | 129           |
| AS87_07455              | TATTCGTAGCGCTGTTGCT                | AGCACCAACACCTTCAGCAG               | 179           |
| AS87_07825              | AGCAGGTGTAGCTTCGTGCT               | TGGCAACAATTAAGTAAAACAAG            | 125           |
| AS87_07870              | TCATCACTTGCAGCAGAAGC               | TTGCAGAGAGAAACGGTGGT               | 220           |
| AS87_01795              | CACCTCGGCTAAGGTAATGG               | TGGGTTTTGGTTTTGAGGTC               | 165           |
| AS87_05160              | GGTGCTGTAGTGAATGGTCCT              | TGAGCTGAAAGTTGGAActGC              | 113           |
| AS87_04930              | ATTTGGGATGGGCTTAGGTT               | CCCTTCTTTGTTcAGGCAA                | 235           |
| AS87_02265              | GGGTAGATTTGGGTGTGTGG               | GACGCATCTGTGCAGTAGGA               | 171           |
| AS87_03335              | ATCCGTTGACAAAACCGAAG               | CCGTAGCATATTCGGAGGAA               | 155           |
| AS87_05990              | TGATGAGGATTGGATGTGGA               | CCACCACCTTCATAActCC                | 153           |
| AS87_03725              | CGCCAAAAGCAACGATTTAT               | CTTCTGGGTCGTTACGGAAA               | 155           |
| AS87_03730              | GAAGACCCGCTGTTCGTATGT              | CGCCCCAAAActTGAAAATA               | 152           |
| AS87_03735              | AAGCTTTAGCGCTTCGAGTG               | CAACACGGTACAACCACCAC               | 191           |

<sup>a</sup> Based on *R. anatipestifer* Yb2 genome (accession number: CP007204).
